# Supplementary material for: Dynamic Patterns of Sex Chromosome Evolution in Neognath Birds: Many Independent Barriers to Recombination at the ATP5F1A Locus
Source: Preprints.org preprint supplement (doi:10.20944/preprints202112.0075.v1), 2021-12-06
Supplement: Supplementary file 2 [file supplementary]

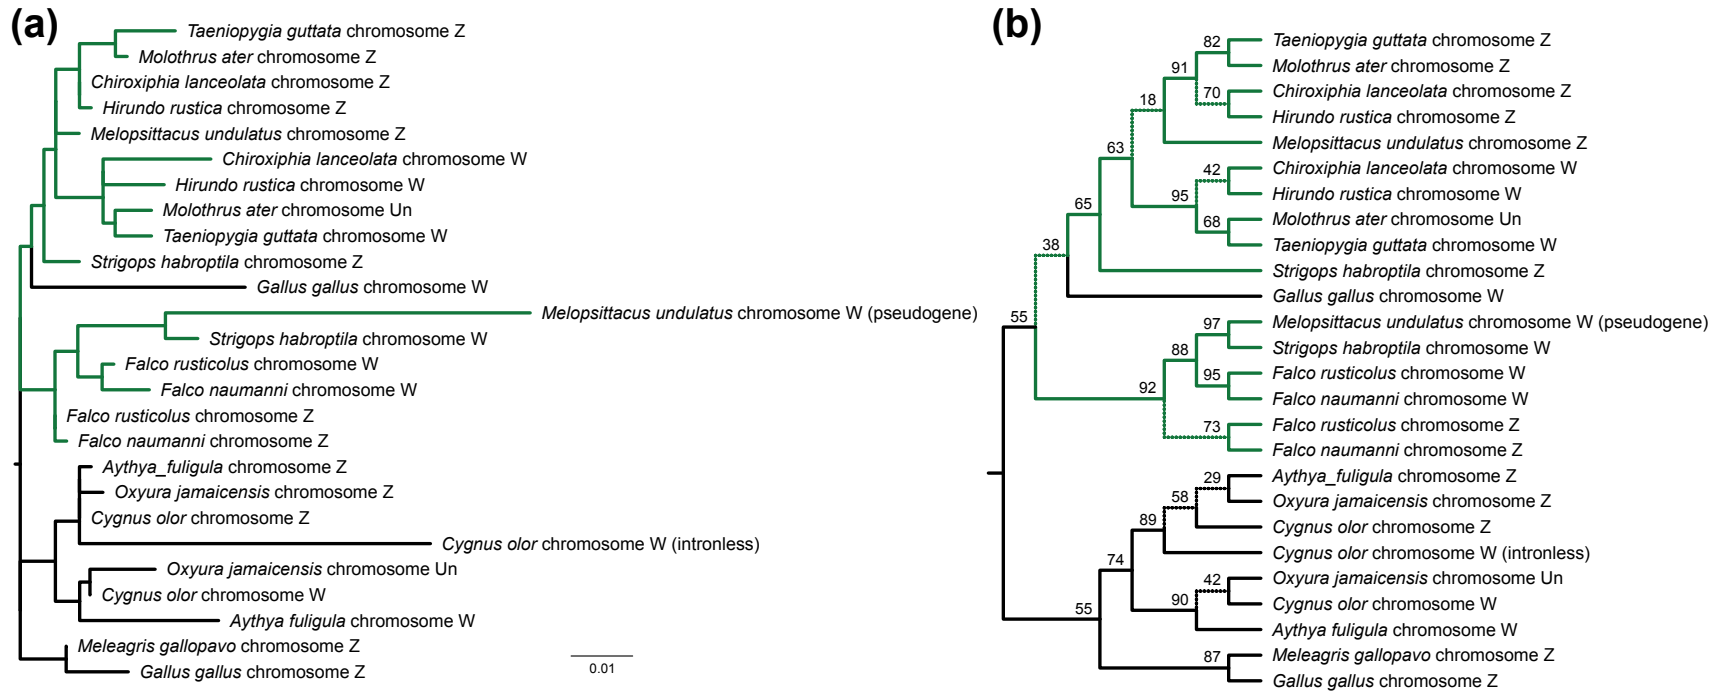

**Supplementary Figure S1.** Maximum likelihood tree for ATP5FA1 proteins obtained using the MamXB+FO+G4 model of sequence evolution in IQ-TREE. Rate matrices for the MamXB model are available in a nexus file from [https://github.com/eBraun68/clade\\_specific\\_prot\\_models](https://github.com/eBraun68/clade_specific_prot_models) (last accessed 24 November 2021). **(a)** Topology with branch lengths. **(b)** Topology with ultrafast bootstrap values. Note that the topologies in parts **a** and **b** are identical, part **b** is presented as a cladogram to make it easier to read the support values. The position of the root is arbitrary.
